# Supplementary material for: Permeance of Condensable Gases in Rubbery Polymer Membranes at High Pressure
Source: MDPI journal article supplement (doi:10.3390/membranes14030066), 2024-03-06
Supplement: s1 [file s1]

*Supplementary Materials*

# Permeance of Condensable Gases in Rubbery Polymer Membranes at High Pressure

Karina Schuldt <sup>1,2</sup>, Jelena Lillepär <sup>1,\*</sup>, Jan Pohlmann <sup>1</sup>, Torsten Brinkmann <sup>1</sup> and Sergey Shishatskiy <sup>1</sup>

<sup>1</sup> Helmholtz-Zentrum Hereon, Institute of Membrane Research, Max-Planck-Str. 1, 21502 Geesthacht, Germany

<sup>2</sup> Camfil GmbH, Feldstraße 26-32, 23585 Reinfeld, Germany

\* Correspondence: jelena.lillepaerg@hereon.de; Tel.: +49-4152-87-2448

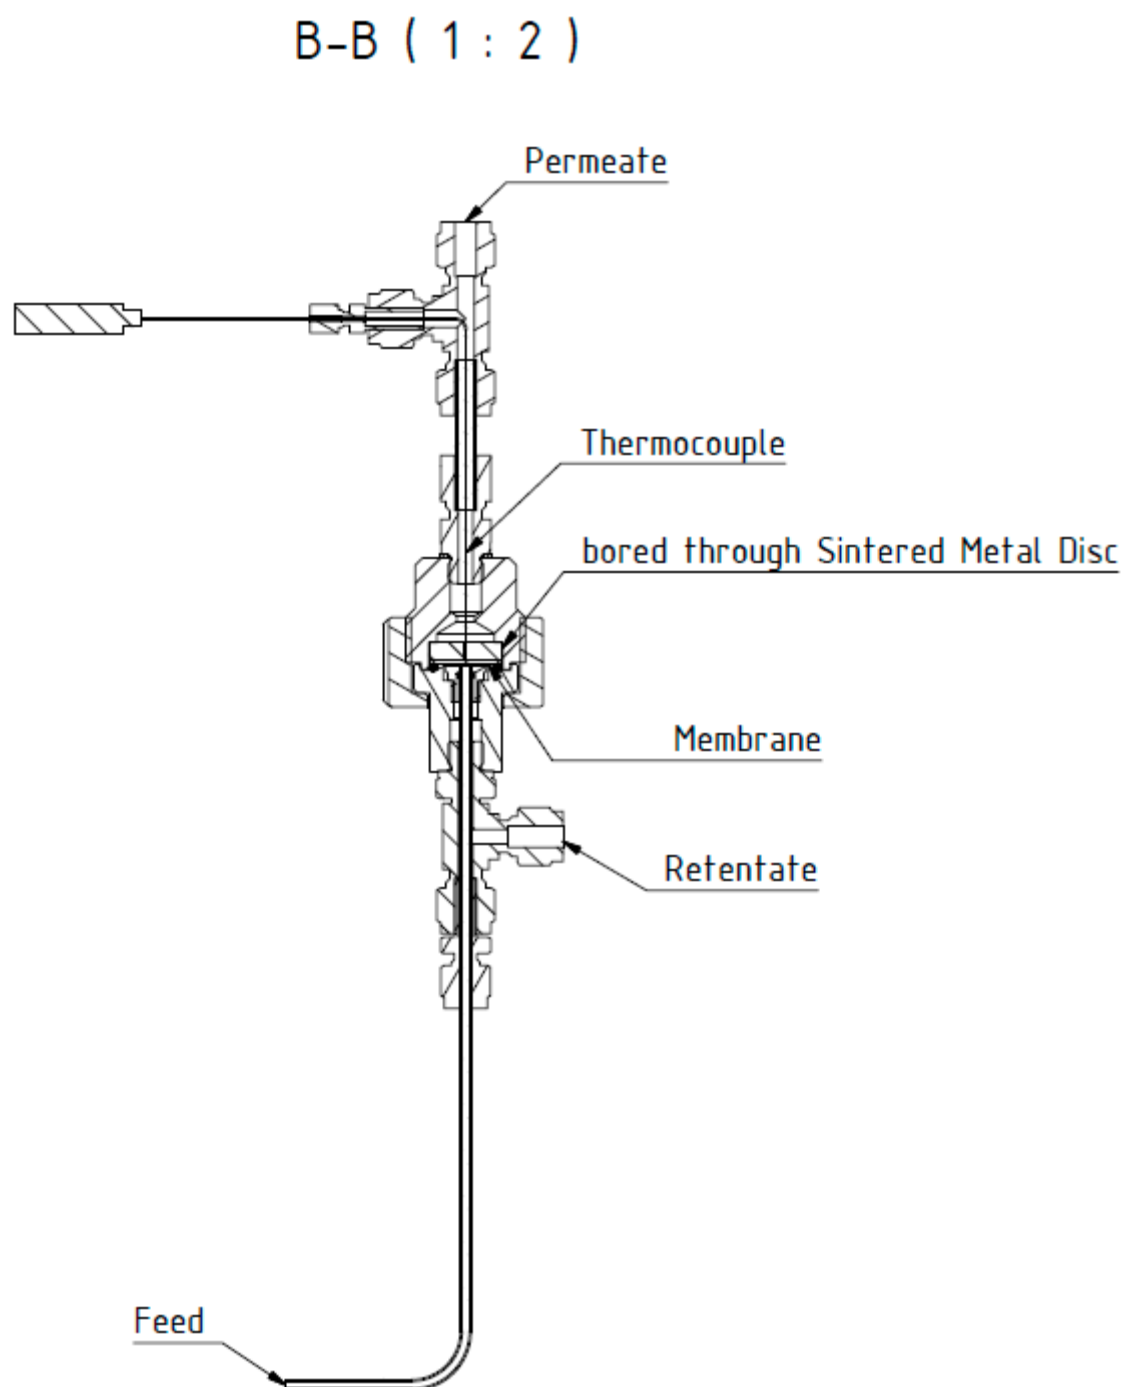

**Figure S1.** The scheme of the test cell build in the setup used for single gas experiments at high pressures.

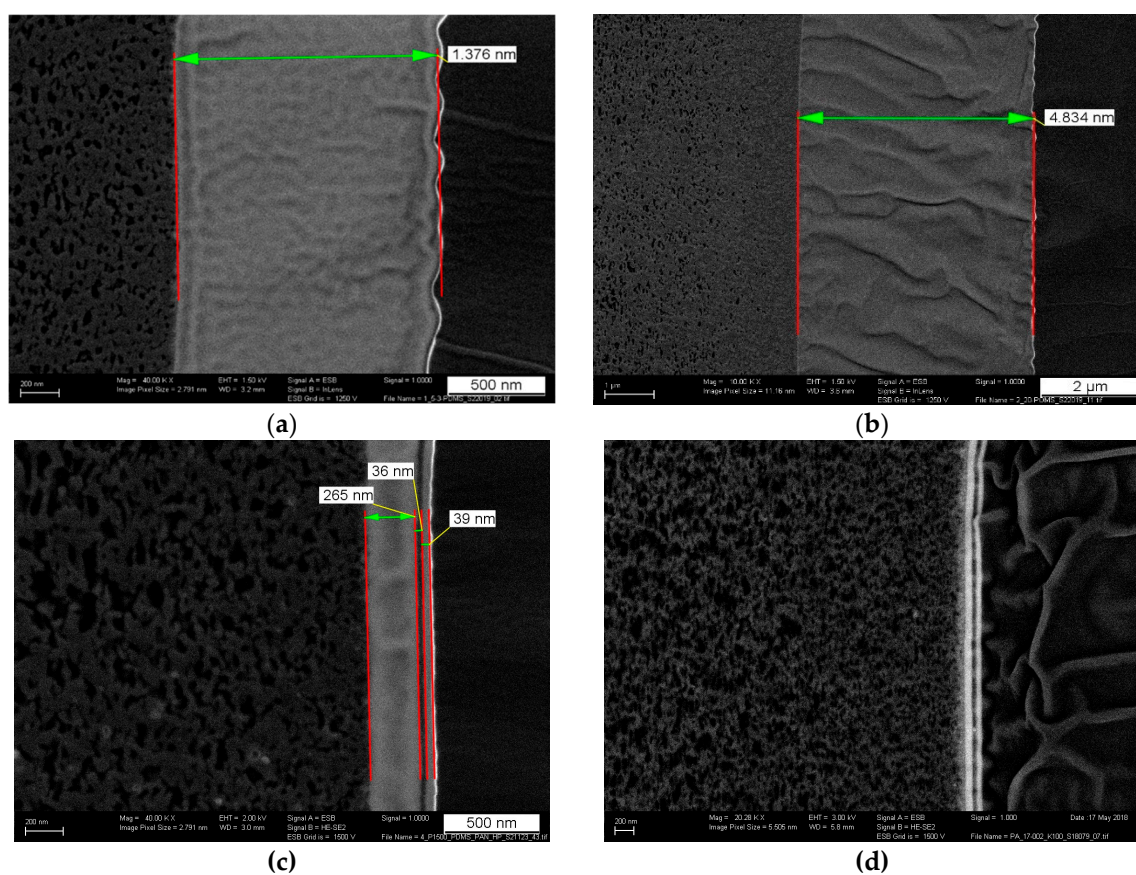

**Figure S2.** Scanning electron microscope (SEM) images of cross sections on TFCM membranes: (a) PDMS1280-PAN; (b) POMS6250-GL; (c, d) standard TFCM.
